# Supplementary material
Source: Elsevier journal article supplement (https://www.sciencedirect.com/science/article/pii/S0213005X22001203)
Supplement: mmc1 [file S0213005X22001203:mmc1.doc]

Anexo 1. Tabla descriptiva de las mutaciones en la secuencia de aminoácidos de la proteína S en muestras positivas para SARS-CoV-2.

| Código | Código Genbank | Secuenciación  por Sanger | | Secuenciación NGS | | Mutaciones ClasificatoriasNextstrain | pango lineage | Clasificación OMS |
| --- | --- | --- | --- | --- | --- | --- | --- | --- |
| Nextstrain Clado | Mutaciones | Nextstrain Clado | Mutaciones |
| **B1** | OM189518 | 19B | S:D614G | 20A | S:D614G | **No aplica** | B.1 | No aplica |
|  |  |  |
| **5703** | OM128430 | 19B | S:W152R | 20A | S:W152R | **No aplica** | B.1.111 | No aplica |
| S:D614G | S:D614G |
| **1604** | OM060697 | 20A | S:H69- | 20A | No detectado | **S:H69-** | [B.1.625](https://outbreak.info/situation-reports?pango=B.1.625) | No aplica |
| S:V70- | No detectado | **S:V70-** |
| S:Y144- | No detectado | **S:Y144-** |
| S:F157L | S:F157L | **S:F157L** |
| S:N440K | S:N440K | **S:N440K** |
| S:E484K | S:E484K | **S:E484K** |
| S:D614G | S:D614G | **S:D614G** |
| S:D950N | S:D950N | **S:D950N** |
| No detectado | S:V1228L | **S:V1228L** |
| S:T95I* |  |  |
| **2403** | OM189474 | 20A | S:H69- | 20A | No detectado | **S:H69-** | [B.1.625](https://outbreak.info/situation-reports?pango=B.1.625) | No aplica |
| S:V70- | No detectado | **S:V70-** |
| S:Y144- | No detectado | **S:Y144-** |
| S:F157L | No detectado | **S:F157L** |
| S:N440K | S:N440K | **S:N440K** |
| S:E484K | S:E484K | **S:E484K** |
| S:D614G | S:D614G | **S:D614G** |
| S:D950N | S:D950N | **S:D950N** |
| No detectado | S:V1228L | **S:V1228L** |
| S:T95I* |  |  |
| **12422** | OM127616 | 20A | S:D614G | 20A | S:D614G | **S:D614G** | [B.1.625](https://outbreak.info/situation-reports?pango=B.1.625) | No aplica |
| No detectado | S:V1228L | **S:V1228L** |
| S:E484K | S:E484K | **S:E484K** |
| S:D950N | S:D950N | **S:D950N** |
| S:N440K | S:N440K | **S:N440K** |
| S:F157L | S:F157L | **S:F157L** |
| S:T95I* | S:T95I* |  |
|  | S:K558* |  |
|  | S:L1186F* |  |
|  | S:V608D* |  |
| **11072** | OM060676 | 20I (Alpha, V1) | S:H69- | 20I (Alpha, V1) | S:H69- | **S:H69-** | B.1.1.7 | Alpha |
| S:V70- | S:V70- | **S:V70-** |
| S:Y144- | S:Y144- | **S:Y144-** |
| S:N501Y | No detectado | **S:N501Y** |
| S:A570D | S:A570D | **S:A570D** |
| S:D614G | S:D614G | **S:D614G** |
| S:P681H | S:P681H | **S:P681H** |
| S:T716I | S:T716I | **S:T716I** |
| S:S982A | S:S982A | **S:S982A** |
| No detectado | S:D1118H | **S:D1118H** |
|  | S:L1186F* |  |
|  | S:K558* |  |
|  | S:V608* |  |
|  | S:N764Y* |  |
| **BC8** | OM189517 | 20I (Alpha, V1) | S:H69- | 20I (Alpha, V1) | No detectado | **S:H69-** | B.1.1.7 | Alpha |
| S:V70- | No detectado | **S:V70-** |
| S:Y144- | No detectado | **S:Y144-** |
| S:N501Y | S:N501Y | **S:N501Y** |
| S:A570D | S:A570D | **S:A570D** |
| S:D614G | S:D614G | **S:D614G** |
| S:P681H | S:P681H | **S:P681H** |
| S:T716I | S:T716I | **S:T716I** |
| S:S982A | S:S982A | **S:S982A** |
| No detectado | No detectado | **S:D1118H** |
| S:I584S* | S:R21T* |  |
|  |  |  |
| **11896** | OM066777 | 20J (Gamma, V3) | No detectado | 20J (Gamma, V3 | S:L18F | **S:L18F** | P.1 | Gamma |
| No detectado | S:T20N | **S:T20N** |
| No detectado | S:P26S | **S:P26S** |
| S:D138Y | No detectado | **S:D138Y** |
| S:R190S | No detectado | **S:R190S** |
| S:K417T | S:K417T | **S:K417T** |
| S:E484K | S:E484K | **S:E484K** |
| S:N501Y | No detectado | **S:N501Y** |
| S:D614G | S:D614G | **S:D614G** |
| S:H655Y | No detectado | **S:H655Y** |
| S:T1027I | S:T1027I | **S:T1027I** |
| No detectado | S:V1176F | **S:V1176F** |
|  | S:L5F* |  |
|  | S:K558* |  |
|  | S:V608D* |  |
|  | S:G667D* |  |
|  | S:S680F* |  |
|  | S:L1186F* |  |
| **BC22** | OM189519 | 20J (Gamma, V3) | No detectado | 20J (Gamma, V3) | S:L18F | **S:L18F** | P.1 | Gamma |
| No detectado | S:T20N | **S:T20N** |
| No detectado | No detectado | **S:P26S** |
| S:D138Y | No detectado | **S:D138Y** |
| S:R190S | S:R190S | **S:R190S** |
| S:K417T | S:K417T | **S:K417T** |
| S:E484K | S:E484K | **S:E484K** |
| S:N501Y | S:N501Y | **S:N501Y** |
| S:D614G | S:D614G | **S:D614G** |
| S:H655Y | S:H655Y | **S:H655Y** |
| S:T1027I | S:T1027I | **S:T1027I** |
| No detectado | S:V1176F | **S:V1176F** |
| **28657** | OM128446 | 20J (Gamma, V3) | No detectado | 20J (Gamma, V3) | No detectado | **S:L18F** | P.1 | Gamma |
| No detectado | No detectado | **S:T20N** |
| No detectado | No detectado | **S:P26S** |
| S:D138Y | No detectado | **S:D138Y** |
| S:R190S | No detectado | **S:R190S** |
| S:K417T | No detectado | **S:K417T** |
| S:E484K | No detectado | **S:E484K** |
| S:N501Y | No detectado | **S:N501Y** |
| S:D614G | S:D614G | **S:D614G** |
| S:H655Y | S:H655Y | **S:H655Y** |
| S:T1027I | S:T1027I | **S:T1027I** |
| No detectado | No detectado | **S:V1176F** |
| **30535** | OM128454 | 21H (Mu) | S:T95I | 21H (Mu) | S:T95I | **S:T95I** | B.1.621 | Mu |
| S:Y144S | S:Y144S | **S:Y144S** |
| S:Y145N | S:Y145N | **S:Y145N** |
| No detectado | No detectado | **S:R346K** |
| S:E484K | S:E484K | **S:E484K** |
| S:N501Y | No detectado | **S:N501Y** |
| S:D614G | S:D614G | **S:D614G** |
| S:P681H | S:P681H | **S:P681H** |
| S:D950N | S:D950N | **S:D950N** |
| S:P209L* | S:P209L* |  |
| S:D138Y * | S:D138Y* |  |
| S:R346K* | S:K558* |  |
| S:S530A* |  |  |
|  |  |  |
| **12932** | OM128455 | 21H (Mu) | S:T95I | 21H (Mu) | No detectado | **S:T95I** | B.1.621 | Mu |
| S:Y144S | S:Y144S | **S:Y144S** |
| S:Y145N | S:Y145N | **S:Y145N** |
| S:R346K | No detectado | **S:R346K** |
| S:E484K | No detectado | **S:E484K** |
| S:N501Y | No detectado | **S:N501Y** |
| S:D614G | S:D614G | **S:D614G** |
| S:P681H | S:P681H | **S:P681H** |
| S:D950N | No detectado | **S:D950N** |
| S:F55L* | S:V608D* |  |
|  | S:K558* |  |
| BC13 | OM301638 | 21H (Mu) | S:T95I | 21H (Mu) | S:T95I | **S:T95I** | B.1.621 | Mu |
| S:Y144S | S:Y144S | **S:Y144S** |
| S:Y145N | S:Y145N | **S:Y145N** |
| S:R346K | S:R346K | **S:R346K** |
| S:E484K | S:E484K | **S:E484K** |
| S:N501Y | S:N501Y | **S:N501Y** |
| S:D614G | S:D614G | **S:D614G** |
| S:P681H | S:P681H | **S:P681H** |
| S:D950N | S:D950N | **S:D950N** |
| **36211** | OM142697 | 21A (Delta) | No detectado | 21J (Delta) | S:T19R | **S:T19R** | B.1.617.2 | Delta |
| No detectado | No detectado | **S:E156-** |
| No detectado | No detectado | **S:F157-** |
| S:R158G | S:R158G | **S:R158G** |
| S:L452R | S:L452R | **S:L452R** |
| S:T478K | S:T478K | **S:T478K** |
| S:D614G | S:D614G | **S:D614G** |
| S:P681R | S:P681R | **S:P681R** |
| S:D950N | S:D950N | **S:D950N** |
| S:G142D* | S:G142D* |  |
| **M1** | OM066778 | 21K (Omicron) | S:A67V | 21K (Omicron) |  | **S:**A67V | BA.1 | Omicron |
| **S:**H69- |  | **S:**H69- |
| **S:**V70- |  | **S:**V70- |
| **S:**T95I |  | **S:**T95I |
| **S:**G142- |  | **S:**G142- |
| **S:**V143- |  | **S:**V143- |
| **S:**Y144- |  | **S:**Y144- |
| **S:**Y145D |  | **S:**Y145D |
| **S:**N211- |  | **S:**N211- |
| **S:**L212I |  | **S:**L212I |
| **S:**G339D |  | **S:**G339D |
| **S:**S371L |  | **S:**S371L |
| **S:**S373P |  | **S:**S373P |
| **S:**S375F |  | **S:**S375F |
| **S:**K417N |  | **S:**K417N |
| **S:**N440K |  | **S:**N440K |
| **S:**G446S |  | **S:**G446S |
| **S:**S477N |  | **S:**S477N |
| **S:**T478K |  | **S:**T478K |
| **S:**E484A |  | **S:**E484A |
| **S:**Q493R |  | **S:**Q493R |
| **S:**G496S |  | **S:**G496S |
| **S:**Q498R |  | **S:**Q498R |
| **S:**N501Y |  | **S:**N501Y |
| **S:**Y505H |  | **S:**Y505H |
| **S:**T547K |  | **S:**T547K |
| **S:**D614G |  | **S:**D614G |
| **S:**H655Y |  | **S:**H655Y |
| **S:**N679K |  | **S:**N679K |
| **S:**P681H |  | **S:**P681H |
| **S:**N764K |  | **S:**N764K |
| **S:**D796Y |  | **S:**D796Y |
| **S:**N856K |  | **S:**N856K |
| **S:**Q954H |  | **S:**Q954H |
| **S:**N969K |  | **S:**N969K |
| **S:**L981F |  | **S:**L981F |
| **S:**R346K+ |  |  |  |

*Mutación adicional

+ mutación de monitoreo
